# Supplementary material for: Characterization of Glycosyltransferase Family 1 (GT1) and Their Potential Roles in Anthocyanin Biosynthesis in Maize
Source: MDPI journal article supplement (doi:10.3390/genes14112099), 2023-11-18
Supplement: s1 [file s1]

**Figure S1**

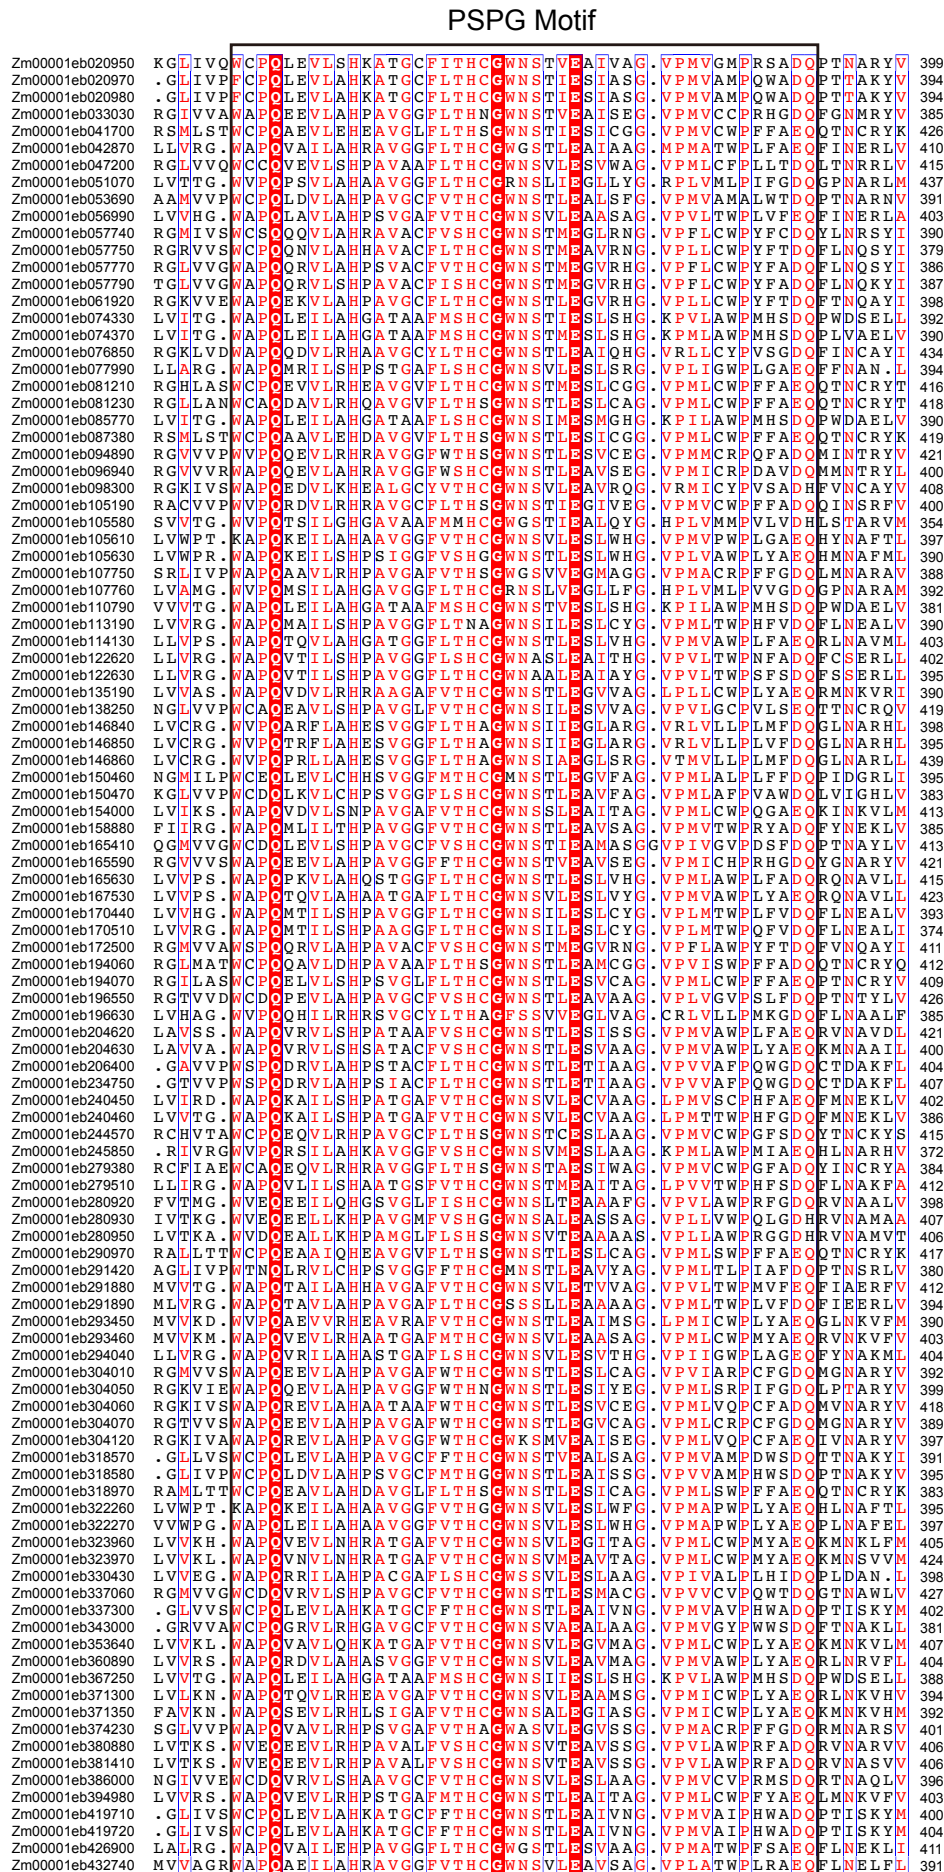

**Figure S1** Multiple sequence alignment of 107 GT1 proteins. All GT1 proteins contain the conserved PSPG motif (black box) in their C-terminus.

Figure S2

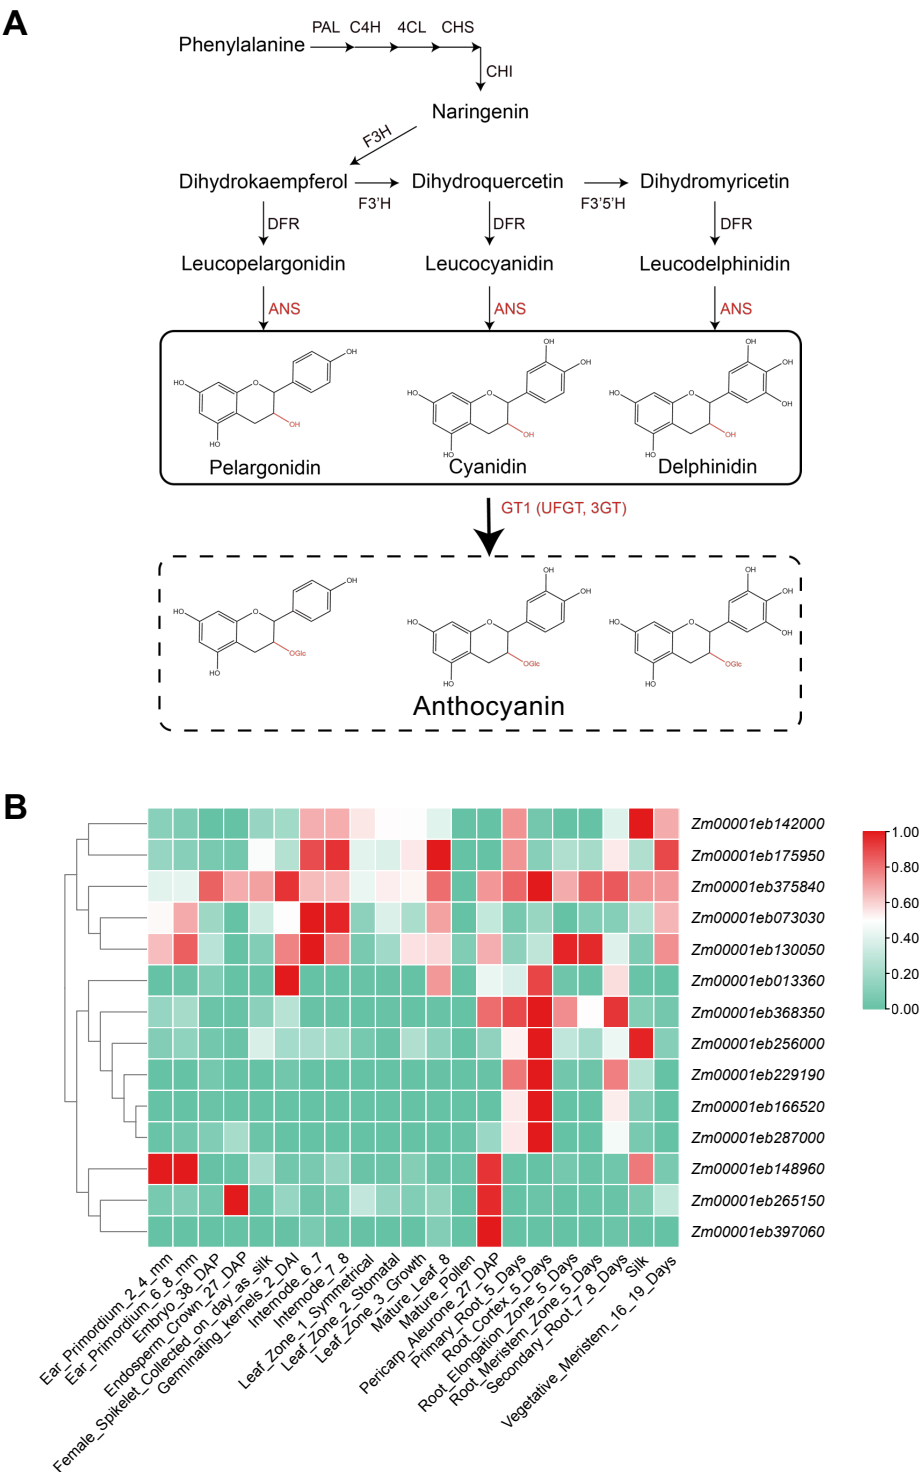

**Figure S2** Expression profiles of ANS genes involved in anthocyanin biosynthesis. **A** The pathway of anthocyanin biosynthesis. PAL, phenylalanine ammonia lyase; C4H, cinnamate 4-hydroxylase; 4CL, 4-coumarate CoA ligase; CHS, chalcone synthase; CHI, chalcone isomerase; F3H, flavanone 3-hydroxylase; F3'H, flavonoid 30 hydroxylase; F3'5'H, flavonoid 3050hydroxylase; DFR, dihydroflavonol 4-reductase; ANS, anthocyanidin synthase; 3GT, UDP-galactose flavonoid 3-O-galactosyltransferase. **B** Heat map of ANS gene expression in multiples maize plant tissues. The relative expression levels are depicted according to the color scale, where a change from green to red indicates transcript abundance from low to high. The phylogenetic relationships are shown on the left.
