# Supplementary material for: Characterization of Glycosyltransferase Family 1 (GT1) and Their Potential Roles in Anthocyanin Biosynthesis in Maize
Source: MDPI journal article supplement (doi:10.3390/genes14112099), 2023-11-18
Supplement: s1 [file s1]

**Table S1** Conserved motif features of GT1s.

| Motif No. | Logo                                                                                | E-value   | Sites | Width | Motif Sequence                    |
|-----------|-------------------------------------------------------------------------------------|-----------|-------|-------|-----------------------------------|
| 1         |    | 1.7e-2417 | 107   | 32    | WAPQLEVL AHPAVGAFLTHCGWNSTLEALAAG |
| 2         |    | 1.6e-1116 | 105   | 23    | QLRELALGLEASGRPFLWVVRPP           |
| 3         |    | 2.1e-801  | 105   | 16    | VPMLCWPLFADQFTNA                  |
| 4         |    | 1.1e-611  | 105   | 14    | SVVYVSFGSLASLS                    |
| 5         |    | 3.5e-765  | 105   | 21    | FPAQGHLPMLQLAKRLAARG              |
| 6         |    | 4.5e-565  | 104   | 21    | RADGVLVNTFAELEPEALAAL             |
| 7         |   | 4.7e-512  | 105   | 21    | GSSLWAEDHECLAWLDAQPPR             |
| 8         |  | 2.3e-354  | 83    | 15    | LPEGFLERTKGRGLV                   |
| 9         |  | 9.1e-405  | 90    | 21    | AAELKEAARA AAVEGGSSDRN            |
| 10        |  | 3.1e-383  | 102   | 21    | GVVTR EEVAAAVREVMEGEEG            |

**Table S2** Summary of gene clusters of GT1s in all maize chromosomes.

| No. | Chr   | Clustered Genes                                                                            |
|-----|-------|--------------------------------------------------------------------------------------------|
| 1   | Chr1  | <i>Zm00001eb020950, Zm00001eb020970, Zm00001eb020980</i>                                   |
| 2   | Chr1  | <i>Zm00001eb057740, Zm00001eb057750, Zm00001eb057770, Zm00001eb057790</i>                  |
| 3   | Chr2  | <i>Zm00001eb074330, Zm00001eb074370</i>                                                    |
| 4   | Chr2  | <i>Zm00001eb081210, Zm00001eb081230</i>                                                    |
| 5   | Chr2  | <i>Zm00001eb105580, Zm00001eb105610, Zm00001eb105630</i>                                   |
| 6   | Chr2  | <i>Zm00001eb107750, Zm00001eb107760</i>                                                    |
| 7   | Chr3  | <i>Zm00001eb122620, Zm00001eb122630</i>                                                    |
| 8   | Chr3  | <i>Zm00001eb146840, Zm00001eb146850, Zm00001eb146860</i>                                   |
| 9   | Chr3  | <i>Zm00001eb150460, Zm00001eb150470</i>                                                    |
| 10  | Chr4  | <i>Zm00001eb165410, Zm00001eb165590, Zm00001eb165630</i>                                   |
| 11  | Chr4  | <i>Zm00001eb170440, Zm00001eb170510</i>                                                    |
| 12  | Chr4  | <i>Zm00001eb194060, Zm00001eb194070</i>                                                    |
| 13  | Chr4  | <i>Zm00001eb196550, Zm00001eb196630</i>                                                    |
| 14  | Chr4  | <i>Zm00001eb204620, Zm00001eb204630</i>                                                    |
| 15  | Chr5  | <i>Zm00001eb240450, Zm00001eb240460</i>                                                    |
| 16  | Chr6  | <i>Zm00001eb279380, Zm00001eb279510</i>                                                    |
| 17  | Chr6  | <i>Zm00001eb280920, Zm00001eb280930, Zm00001eb280950</i>                                   |
| 18  | Chr6  | <i>Zm00001eb291880, Zm00001eb291890</i>                                                    |
| 19  | Chr6  | <i>Zm00001eb293450, Zm00001eb293460</i>                                                    |
| 20  | Chr7  | <i>Zm00001eb304010, Zm00001eb304050, Zm00001eb304060, Zm00001eb304070, Zm00001eb304120</i> |
| 21  | Chr7  | <i>Zm00001eb318570, Zm00001eb318580</i>                                                    |
| 22  | Chr7  | <i>Zm00001eb322260, Zm00001eb322270</i>                                                    |
| 23  | Chr7  | <i>Zm00001eb323960, Zm00001eb323970</i>                                                    |
| 24  | Chr8  | <i>Zm00001eb371300, Zm00001eb371350</i>                                                    |
| 25  | Chr10 | <i>Zm00001eb419710, Zm00001eb419720</i>                                                    |

**Table S3** Summary of duplicated gene pairs of GT1s.

| <b>No.</b> | <b>Duplicated Gene</b> |                        |
|------------|------------------------|------------------------|
| 1          | <i>Zm00001eb063070</i> | <i>Zm00001eb096940</i> |
| 2          | <i>Zm00001eb047200</i> | <i>Zm00001eb222590</i> |
| 3          | <i>Zm00001eb057750</i> | <i>Zm00001eb214570</i> |
| 4          | <i>Zm00001eb063070</i> | <i>Zm00001eb304010</i> |
| 5          | <i>Zm00001eb113190</i> | <i>Zm00001eb170440</i> |
| 6          | <i>Zm00001eb081230</i> | <i>Zm00001eb244710</i> |
| 7          | <i>Zm00001eb076850</i> | <i>Zm00001eb248110</i> |
| 8          | <i>Zm00001eb105610</i> | <i>Zm00001eb322190</i> |
| 9          | <i>Zm00001eb105630</i> | <i>Zm00001eb322210</i> |
| 10         | <i>Zm00001eb111270</i> | <i>Zm00001eb330430</i> |
| 11         | <i>Zm00001eb102880</i> | <i>Zm00001eb318570</i> |
| 12         | <i>Zm00001eb096940</i> | <i>Zm00001eb304010</i> |
| 13         | <i>Zm00001eb094890</i> | <i>Zm00001eb304010</i> |
| 14         | <i>Zm00001eb163360</i> | <i>Zm00001eb196550</i> |
| 15         | <i>Zm00001eb150460</i> | <i>Zm00001eb291420</i> |
| 16         | <i>Zm00001eb122620</i> | <i>Zm00001eb283060</i> |
| 17         | <i>Zm00001eb156460</i> | <i>Zm00001eb343000</i> |
| 18         | <i>Zm00001eb153990</i> | <i>Zm00001eb353640</i> |
| 19         | <i>Zm00001eb122240</i> | <i>Zm00001eb337060</i> |
| 20         | <i>Zm00001eb194070</i> | <i>Zm00001eb279380</i> |
| 21         | <i>Zm00001eb206400</i> | <i>Zm00001eb234750</i> |
| 22         | <i>Zm00001eb291880</i> | <i>Zm00001eb352700</i> |
| 23         | <i>Zm00001eb293440</i> | <i>Zm00001eb371350</i> |
| 24         | <i>Zm00001eb293460</i> | <i>Zm00001eb371290</i> |
| 25         | <i>Zm00001eb280920</i> | <i>Zm00001eb380880</i> |

**Table S4** Putative *ANS* genes of maize.

| Gene ID                | Chr  | Chromosomal Position | Gene Symbol |
|------------------------|------|----------------------|-------------|
| <i>Zm00001eb013360</i> | Chr1 | 44729549–44735265    | <i>SRG1</i> |
| <i>Zm00001eb073030</i> | Chr2 | 15774137–15777049    |             |
| <i>Zm00001eb130050</i> | Chr3 | 52947715–52950003    |             |
| <i>Zm00001eb142000</i> | Chr3 | 156270441–156272338  |             |
| <i>Zm00001eb148960</i> | Chr3 | 187946425–187951771  |             |
| <i>Zm00001eb166520</i> | Chr4 | 5991734–5992330      |             |
| <i>Zm00001eb175950</i> | Chr4 | 53715253–53717388    |             |
| <i>Zm00001eb229190</i> | Chr5 | 68086545–68088407    |             |
| <i>Zm00001eb256000</i> | Chr5 | 218475557–218477256  |             |
| <i>Zm00001eb265150</i> | Chr6 | 34319837–34324529    |             |
| <i>Zm00001eb287000</i> | Chr6 | 153979278–153985618  |             |
| <i>Zm00001eb368350</i> | Chr8 | 176088819–176092948  |             |
| <i>Zm00001eb397060</i> | Chr9 | 144069882–144073514  |             |
